# Supplementary material
Source: Springer Nature journal article supplement (https://www.springermedizin.de/resource/supplementary/13601_2012_292_MOESM8_ESM.pdf/9677824)

**a naive**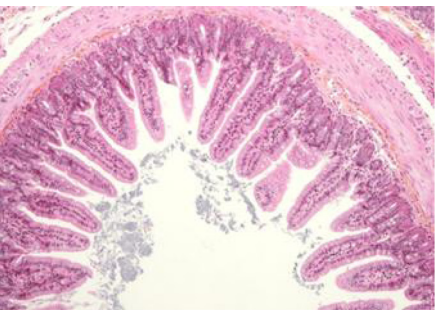**b Sham**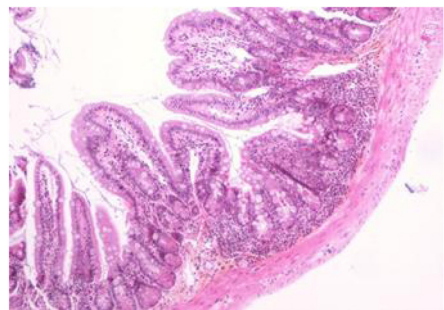**c EPIT**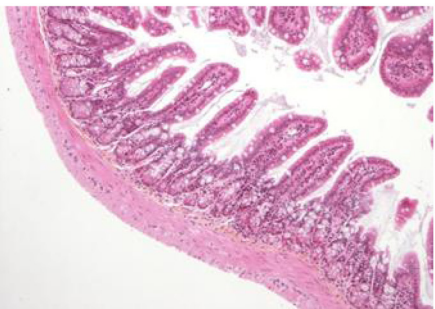**d stripping + EPIT**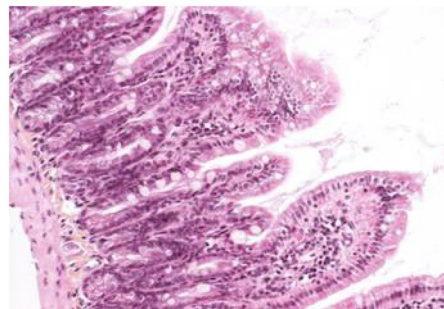**e villus/crypt ratio**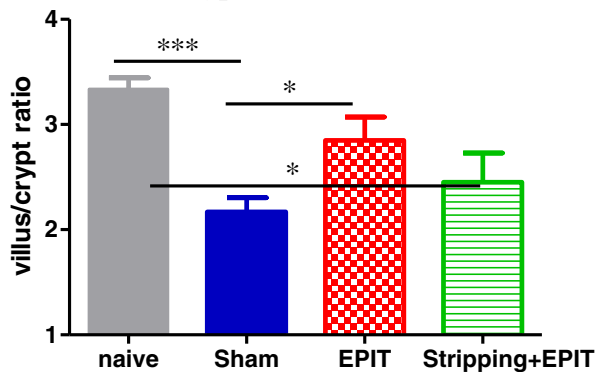

Supplement: MOESM8 [file 9677824]
